# Supplementary material for: Multifunctional Fe3O4 nanoparticles for highly sensitive detection and removal of Al(iii) in aqueous solution
Source: Royal Society of Chemistry journal article supplement (doi:10.1039/c2nr33200k), 2012-12-11
Supplement: c2nr33200k.pdf [file c2nr33200k.pdf]

# Multifunctional Fe<sub>3</sub>O<sub>4</sub> Nanoparticles for Highly Sensitive Detection and Removal of Al(III) in aqueous solution

Lihua Zhi<sup>a,b</sup>, Jian Liu<sup>a</sup>, Yuan Wang<sup>b</sup>, Wei Zhang<sup>c</sup>, Baodui Wang<sup>\*a</sup>, Zhuguo Xu<sup>a</sup>, Zhengyin Yang<sup>a</sup>,  
Xing Huo<sup>a</sup> and Guangming Li<sup>a</sup>

<sup>a</sup> Key Laboratory of Nonferrous Metal Chemistry and Resources Utilization of Gansu Province and State Key Laboratory of Applied Organic Chemistry Lanzhou University Gansu, Lanzhou, 730000 (P.R. China) Lanzhou University, Lanzhou 730000, P.R. China

<sup>b</sup> Department of Physics and Chemistry, Henan Polytechnic University, Jiaozuo 454000, P. R. China

<sup>c</sup> The First Clinical Medical School, Lanzhou University

E-mail: [wangbdgzy@lzu.edu.cn](mailto:wangbdgzy@lzu.edu.cn)

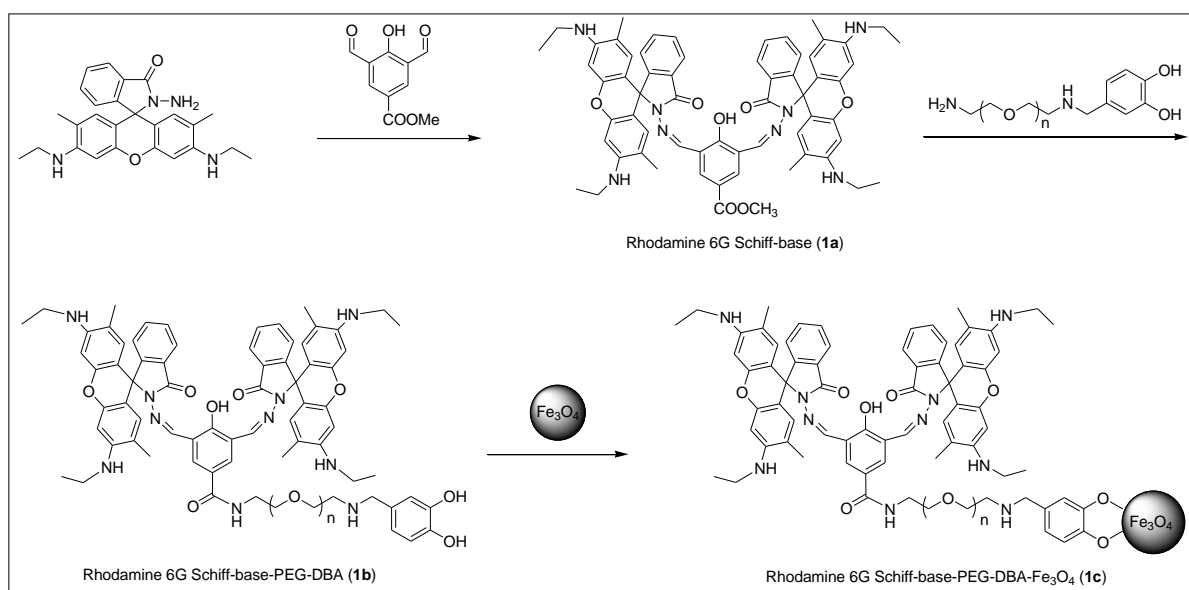

Scheme 1 S1. Synthesis of 1c

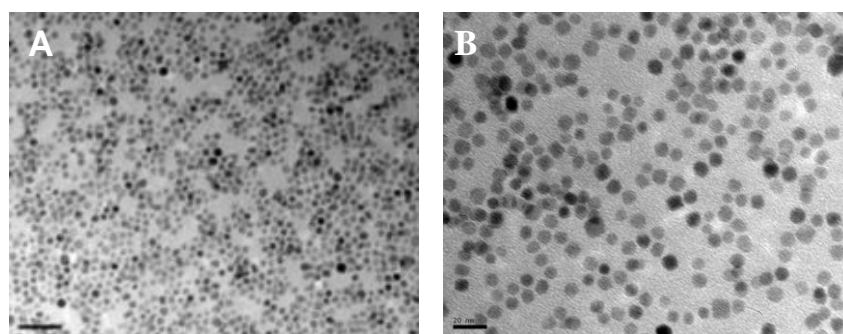

**Figure S1.** TEM images of (A) the as-synthesized Fe<sub>3</sub>O<sub>4</sub> nanoparticles from their hexane dispersion and (B) the 6G Schiff-Base-modified Fe<sub>3</sub>O<sub>4</sub> nanoparticles from their water dispersion.

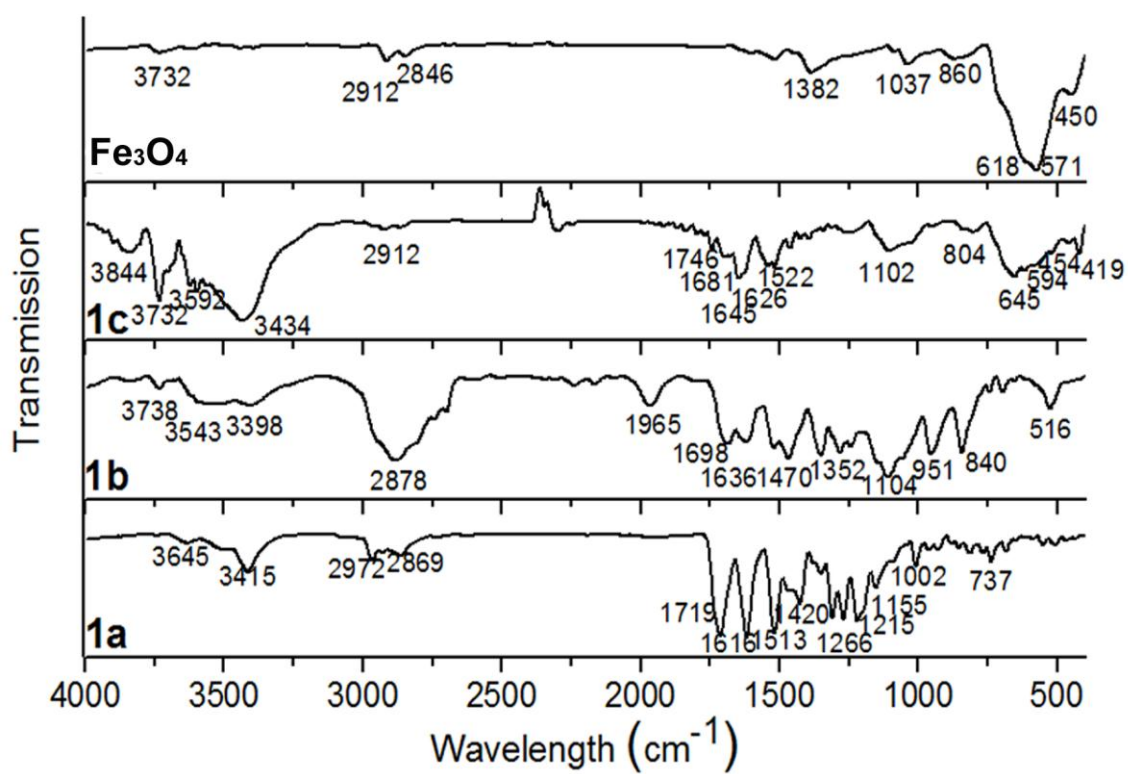

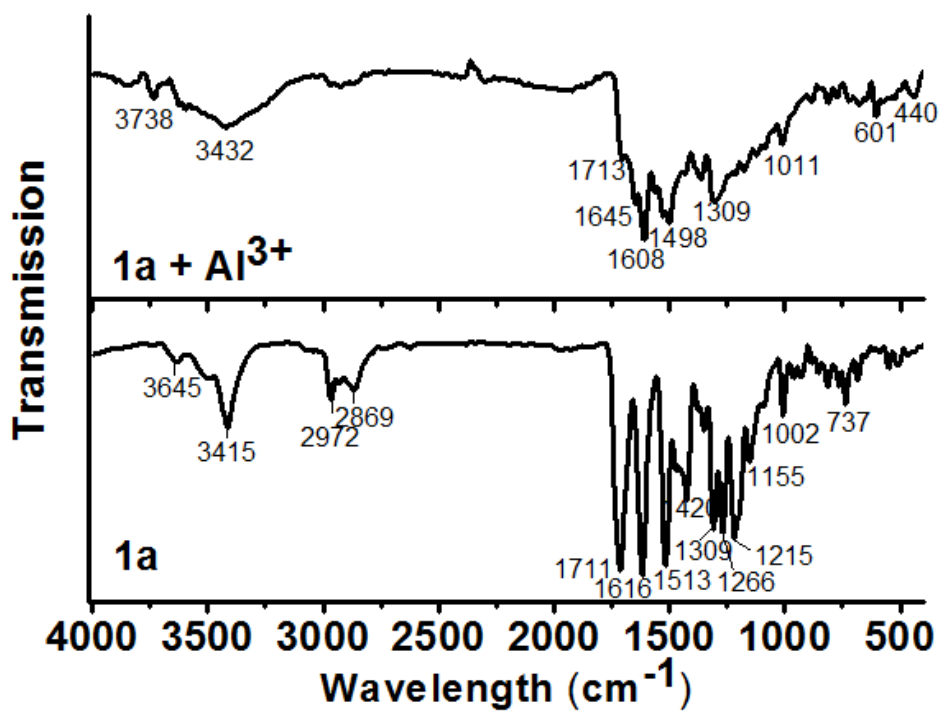

Figure S2. IR spectra of 1a, 1b, 1c, Fe<sub>3</sub>O<sub>4</sub> and 1a + Al<sup>3+</sup>.

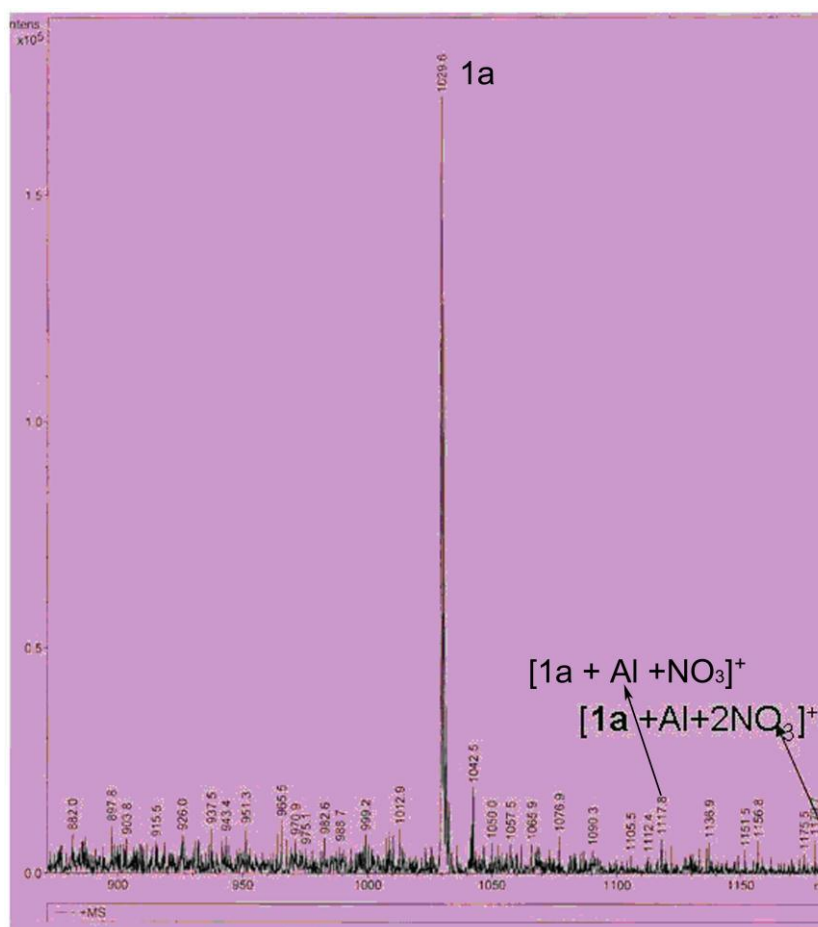

Figure S3. The ESI-MS spectra of 1a:Al complex.

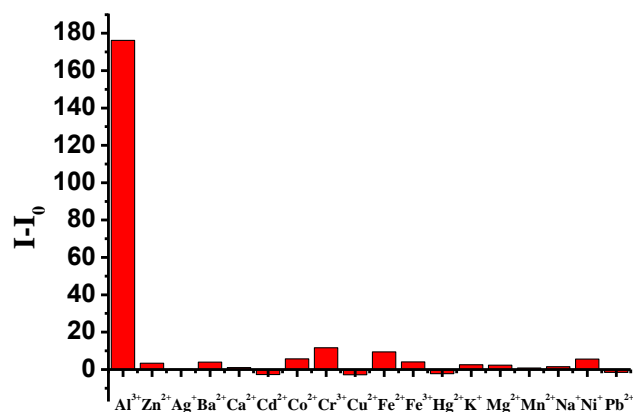

**Figure S4.** Fluorescence changes of **1c** after addition of 4 equiv of metal ions. Excitation wavelength was 515 nm, and the emission was at 544-547 nm. Slit: excitation/emission = 5.0/5.0.  $[\mathbf{1c}] = 10 \mu\text{M}$ ;  $[\text{M}^+] = 40 \mu\text{M}$ .  $I_0$  is the intensity of free **1c** and  $I$  is the intensity of **1c** after adding metal cation.

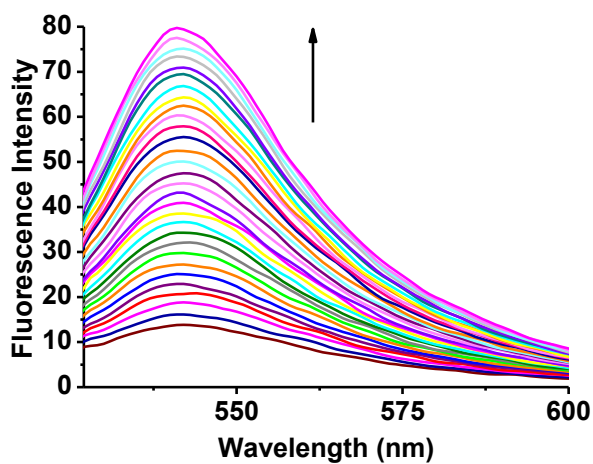

**Figure S5.** Fluorescent emission changes of **1c** ( $10^{-7} \text{M}$ ) upon addition of  $\text{Al}^{3+}$  (by 0.27 ppb) in HEPES buffer (PH = 7) at 25 °C. Slit: excitation/emission = 5.0/5.0.

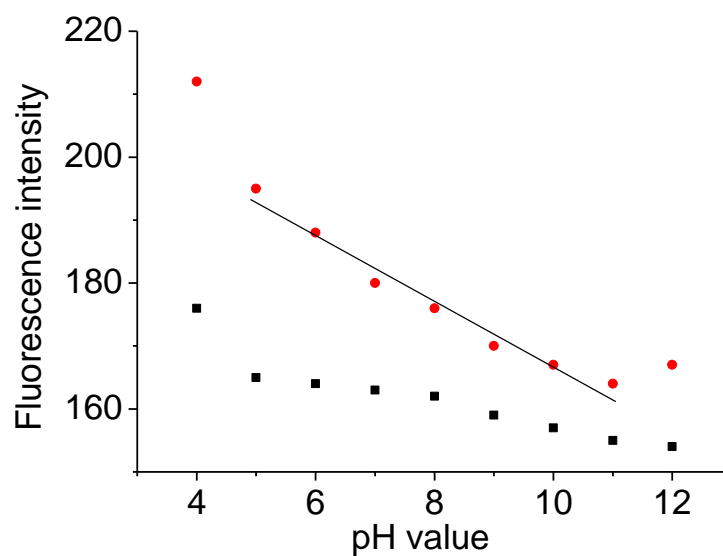

**Figure S6.** Variation of fluorescence intensity for the dispersion (10 $\mu$ M) of **1c** in H<sub>2</sub>O measured with (above) and without (below) Al<sup>3+</sup> ions (40  $\mu$ M) as a function of pH value.

| Sample No.                                           | 1    | 2    | 3    | 4    | 5    | 6    | 7    |
|------------------------------------------------------|------|------|------|------|------|------|------|
| V <sub>Al<sup>3+</sup></sub> (ml)                    | 50   | 50   | 50   | 50   | 50   | 50   | 50   |
| C <sub>Al<sup>3+</sup></sub> <sup>start</sup> (ppm)  | 1.45 | 1.45 | 1.45 | 1.45 | 1.45 | 1.45 | 1.45 |
| m <sub>1c</sub> (mg)                                 | 0    | 5    | 10   | 20   | 30   | 50   | 80   |
| C <sub>Al<sup>3+</sup></sub> <sup>final</sup> (mg/L) | 1.45 | 1.22 | 1.08 | 0.77 | 0.69 | 0.40 | 0.18 |
